# Supplementary material for: Prediction of Prostate Cancer Biochemical and Clinical Recurrence Is Improved by IHC-Assisted Grading Using Appl1, Sortilin and Syndecan-1
Source: MDPI journal article supplement (doi:10.3390/cancers15123215), 2023-06-16
Supplement: s1 [file s1]

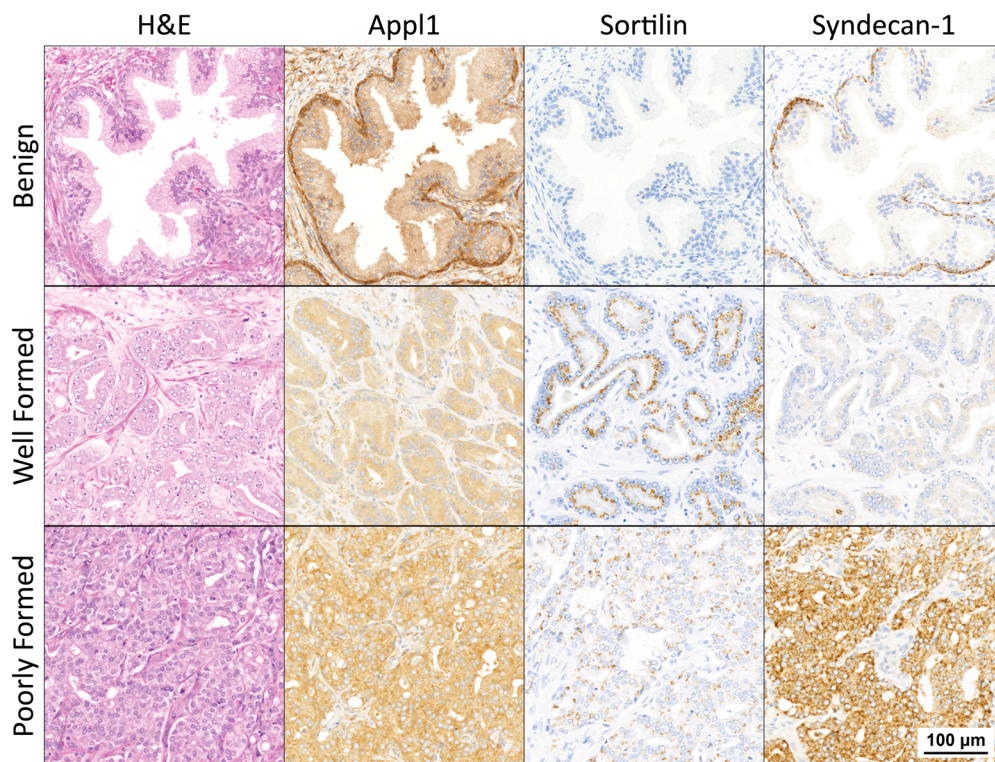

**Supplementary Figure S1: Immunolabelling of Appl1, Sortilin and Syndecan-1 in well-formed and poorly-formed glands.**

Serial sections of tissue from patients with prostate cancer were stained with routine H&E (first column), or labelled with Appl1 (second column), Sortilin (third column) or Syndecan-1 (fourth column). Immunolabelling with Appl1, Sortilin and Syndecan-1 is depicted by a brown immunoprecipitate (DAB). The morphologies identified include regions of benign prostatic glands, well-formed and poorly formed malignant glands.

**Supplementary Table S1: Summary of patient characteristics**

|                          |  | Total<br>No. 114 |
|--------------------------|--|------------------|
| H&E, grade group         |  |                  |
| Benign                   |  | 4 (4%)           |
| 1                        |  | 47 (41%)         |
| 2                        |  | 27 (24%)         |
| 3                        |  | 21 (18%)         |
| 4                        |  | 12 (11%)         |
| 5                        |  | 3 (3%)           |
| IHC-assisted grade group |  |                  |
| Benign                   |  | 3 (3%)           |
| 1                        |  | 34 (30%)         |
| 2                        |  | 36 (32%)         |
| 3                        |  | 22 (19%)         |
| 4                        |  | 15 (13%)         |
| 5                        |  | 4 (4%)           |

|                             |           |
|-----------------------------|-----------|
| Extracapsular extension     | 63 (55%)  |
| Positive surgical margins   | 43 (38%)  |
| Seminal vesicle involvement | 16 (14%)  |
| Perineural involvement      | 104 (91%) |
| Lymphovascular involvement  | 17 (15%)  |

---

Data are number of patients (%).

---

**Supplementary Table S2: Summary of patient characteristics by IHC-assisted grade group**

|                  | Total<br>No. 114 | Benign<br>No. 3 | 1<br>No. 34 | 2<br>No. 36 | 3<br>No. 22 | 4<br>No. 15 | 5<br>No. 4 |
|------------------|------------------|-----------------|-------------|-------------|-------------|-------------|------------|
| H&E, grade group |                  |                 |             |             |             |             |            |
| Benign           | 4 (4%)           | 2 (67%)         | 1 (3%)      | 1 (3%)      | 0 (0%)      | 0 (0%)      | 0 (0%)     |
| 1                | 47 (41%)         | 1 (33%)         | 26 (76%)    | 15 (42%)    | 4 (18%)     | 1 (7%)      | 0 (0%)     |
| 2                | 27 (24%)         | 0 (0%)          | 6 (18%)     | 17 (47%)    | 4 (18%)     | 0 (0%)      | 0 (0%)     |
| 3                | 21 (18%)         | 0 (0%)          | 1 (3%)      | 3 (8%)      | 11 (50%)    | 5 (33%)     | 1 (25%)    |
| 4                | 12 (11%)         | 0 (0%)          | 0 (0%)      | 0 (0%)      | 1 (5%)      | 9 (60%)     | 2 (50%)    |
| 5                | 3 (3%)           | 0 (0%)          | 0 (0%)      | 0 (0%)      | 2 (9%)      | 0 (0%)      | 1 (25%)    |

Data are number of patients (%).
